# Supplementary material
Source: ML conference proceedings conference paper supplement (https://openaccess.thecvf.com/content/ICCV2023/html/Zhang_DeformToon3D_Deformable_Neural_ICCV_2023_paper.html)
Supplement: Supplementary file 3 [file Zhang_DeformToon3D_Deformable_Neural_ICCV_2023_supplemental.zip]

Archive with 4 entries (4 files):
- 01680-supp.pdf
- __MACOSX/._01680-supp.pdf
- 01680-supp-video.mp4
- __MACOSX/._01680-supp-video.mp4
